# Supplementary material for: The CLEC3B inhibits cellular proliferation and metastasis of cholangiocarcinoma through Wnt/β-catenin pathway
Source: PeerJ journal article supplement (doi:10.7717/peerj.18497), 2024-11-13
Supplement: 30TumorTissue.zip [file 30TumorTissue.zip]

## Sheet: 组织表达
N	GAPDH		平均值		CLEC3B		平均值	△T	△△T	power
1533334	20.56	20.5	20.53		23.99	24.89	24.44	3.91	-3.55271e-15	1			1
1525447	21.77	21.95	21.86		24.89	25.71	25.3	3.44	-0.47	1.38511			1.38511		1	1.38511	1.55833	0.888843	1.19748	1.91853	1.38032	0.524858	3.56771	0.524858	0.588453	7.31065	1.34257	1.96564	0.407536	1	0.137738	3.03143	0.602904	0.803851	1.93187	3.54307	2.32141	0.768438	1.03526	1.91189	1.87254	2.25793	1.85318	6.94031
1536754	22.21	21.99	22.1		25.08	25.66	25.37	3.27	-0.64	1.55833			1.55833
1501395	19.87	19.89	19.88		23.62	24.3	23.96	4.08	0.17	0.888843			0.888843
1370526	21.43	21.48	21.455		24.67	25.54	25.105	3.65	-0.26	1.19748			1.19748
1527809	25.93	25.85	25.89		27.54	30.18	28.86	2.97	-0.94	1.91853			1.91853
1602166	21.96	21.83	21.895		24.94	25.74	25.34	3.445	-0.465	1.38032			1.38032
1542615	18.81	18.87	18.84		23.54	23.82	23.68	4.84	0.93	0.524858			0.524858
1492014	24.55	24.93	24.74		27	26.63	26.815	2.075	-1.835	3.56771			3.56771
1283015	18.74	18.68	18.71		24.02	23.08	23.55	4.84	0.93	0.524858			0.524858
1490866	19.55	19.55	19.55		24.66	23.79	24.225	4.675	0.765	0.588453			0.588453
1521704	27.83	27.78	27.805		29.01	28.68	28.845	1.04	-2.87	7.31065			7.31065
1597704	23.01	23.06	23.035		26.29	26.75	26.52	3.485	-0.425	1.34257			1.34257
1512379	25.56	25.57	25.565		28.71	28.29	28.5	2.935	-0.975	1.96564			1.96564
1515659	18.89	18.65	18.77		24.36	23.59	23.975	5.205	1.295	0.407536			0.407536
1582776	19.24	19.15	19.195		23.16	23.05	23.105	3.91	0	1			1
1514977	27.44	27.25	27.345		33.36	34.87	34.115	6.77	2.86	0.137738			0.137738
1577466	27.03	26.53	26.78		29.1	29.08	29.09	2.31	-1.6	3.03143			3.03143
1596604	19.61	19.69	19.65		24.88	23.7	24.29	4.64	0.73	0.602904			0.602904
1546203	21.17	21.05	21.11		25.49	25.18	25.335	4.225	0.315	0.803851			0.803851
1552024	22.57	22.43	22.5		25.58	25.34	25.46	2.96	-0.95	1.93187			1.93187
1551770	24.57	24.18	24.375		26.44	26.48	26.46	2.085	-1.825	3.54307			3.54307
1550391	23.76	24.36	24.06		26.84	26.67	26.755	2.695	-1.215	2.32141			2.32141
1549685	19.48	19.61	19.545		23.94	23.73	23.835	4.29	0.38	0.768438			0.768438
1280748	19.75	19.62	19.685		23.68	23.41	23.545	3.86	-0.05	1.03526			1.03526
1122436	20.13	20.38	20.255		23.17	23.29	23.23	2.975	-0.935	1.91189			1.91189
1320331	19.48	19.88	19.68		22.37	23	22.685	3.005	-0.905	1.87254			1.87254
1477095	19.24	19.87	19.555		22.57	22.01	22.29	2.735	-1.175	2.25793			2.25793
1621446	20.37	21.01	20.69		23.89	23.53	23.71	3.02	-0.89	1.85318			1.85318
1620193	23.48	23.1	23.29		24.25	24.56	24.405	1.115	-2.795	6.94031			6.94031
T	GAPDH		平均值		CLEC3B		平均值	△T	△△T	power			power
1533334	23	22.98	22.99		29.76	30.15	29.955	6.965	3.055	0.120324			0.120324
1525447	21.01	21.06	21.035		30.53	30.54	30.535	9.5	5.59	0.0207607			0.0207607
1536754	16.27	16.18	16.225		26.76	26.82	26.79	10.565	6.655	0.00992305			0.00992305
1370526	15.6	15.54	15.57		26.9	26.62	26.76	11.19	7.28	0.0064343			0.0064343
1527809	25.17	25	25.085		27.83	29.31	28.57	3.485	-0.425	1.34257			1.34257
1602166	16.62	16.65	16.635		27.53	27.45	27.49	10.855	6.945	0.00811609			0.00811609
1542615	20.56	20.6	20.58		30.77	30.99	30.88	10.3	6.39	0.0119239			0.0119239
1492014	20.04	20.63	20.335		29.75	30.56	30.155	9.82	5.91	0.0166308			0.0166308
1283015	18.46	18.43	18.445		26	26.09	26.045	7.6	3.69	0.0774817			0.0774817
1597704	17.33	17.31	17.32		26.45	26.63	26.54	9.22	5.31	0.0252076			0.0252076
1582776	23.2	23.23	23.215		28.99	29	28.995	5.78	1.87	0.273573			0.273573
1514977	17.18	17.22	17.2		23.77	23.54	23.655	6.455	2.545	0.171348			0.171348
1620215	28.11	27.82	27.965		32.12	31.72	31.92	3.955	0.045	0.96929			0.96929
1623594	27.42	27.09	27.255		30.17	31.97	31.07	3.815	-0.095	1.06807			1.06807
1546203	23.99	24.02	24.005		31.86	31.61	31.735	7.73	3.82	0.0708052			0.0708052
1550391	25.86	25.83	25.845		28.32	31.02	29.67	3.825	-0.085	1.06069			1.06069
1501395	29.23	28.79	29.01		32.45	31.98	32.215	3.205	-0.705	1.63014			1.63014
1122436	24.95	24.89	24.92		26.81	26.66	26.735	1.815	-2.095	4.27226			4.27226
1320331	16.91	16.77	16.84		25.32	25.27	25.295	8.455	4.545	0.042837			0.042837
1617756	24.85	24.89	24.87		29.65	29.66	29.655	4.785	0.875	0.545254			0.545254
1535907	28	27.62	27.81		30.5	30.6	30.55	2.74	-1.17	2.25012			2.25012
1655190	28.86	28.57	28.715		31.95	29.58	30.765	2.05	-1.86	3.63008			3.63008
1633982	21.26	21.58	21.42		28.07	28.05	28.06	6.64	2.73	0.150726			0.150726
1649757	18.36	18.7	18.53		24.3	24.38	24.34	5.81	1.9	0.267943			0.267943
1035186	19.12	19.57	19.345		25.31	25.78	25.545	6.2	2.29	0.204476			0.204476
1596807	19.47	20.1	19.785		24.64	24.89	24.765	4.98	1.07	0.476319			0.476319
1620193	17.84	17.64	17.74		23.74	24.21	23.975	6.235	2.325	0.199575			0.199575
1621446	18.62	18.97	18.795		26.21	26.87	26.54	7.745	3.835	0.0700729			0.0700729
1641688	20.81	20.14	20.475		24.35	25.14	24.745	4.27	0.36	0.779165			0.779165
1620774	20.17	20.12	20.145		23.06	23.47	23.265	3.12	-0.79	1.72907			1.72907

## Sheet: 生存
power	是否复发	time
4.27226	1	8.4
3.63008	0	18.9
2.25012	0	2.2
1.72907	0	11.9
1.63014	0	16.7
1.34257	0	5.5
1.06807	0	9.9
1.06069	1	14.5
0.96929	0	17
0.779165	0	19.2
0.545254	0	26.1
0.476319	0	15.12
0.273573	0	1.6
0.267943	0	11.4
0.204476	1	11.5
0.199575	0	1.7
0.171348	1	8.4
0.150726	0	5.5
0.120324	1	14.1
0.0774817	0	12.5
0.0708052	1	3.7
0.0700729	1	13
0.042837	0	26.4
0.0252076	0	1.5
0.0207607	1	13
0.0166308	1	16.8
0.0119239	0	2.2
0.00992305	0	5.9
0.00811609	1	13.5
0.0064343	0	0.3
