# Supplementary material for: The CLEC3B inhibits cellular proliferation and metastasis of cholangiocarcinoma through Wnt/β-catenin pathway
Source: PeerJ journal article supplement (doi:10.7717/peerj.18497), 2024-11-13
Supplement: HUCCT1Fig4.zip [file HUCCT1Fig4.zip]

Slice	Count	Total Area	Average Size	%Area	Mean	IntDen
Clipboard	144	219674	1525.514	10.598	255	389006.042
Clipboard-1	144	303559	2108.049	14.646	255	537552.396
Clipboard-2	144	325013	2257.035	15.69	255	575543.854
Clipboard-3	111	183504	1400.794	8.853	255	357202.443
Clipboard-4	46	65270	1418.913	3.149	255	361822.826
Clipboard-5	53	95852	1808.528	4.625	255	461174.717
Clipboard-6	310	632697	2040.958	30.525	255	520444.306
Clipboard-7	310	632697	2040.958	30.525	255	520444.306
Clipboard-8	246	553696	2250.797	26.714	255	573953.171
