# Supplementary material for: The CLEC3B inhibits cellular proliferation and metastasis of cholangiocarcinoma through Wnt/β-catenin pathway
Source: PeerJ journal article supplement (doi:10.7717/peerj.18497), 2024-11-13
Supplement: QBC939Fig4.zip [file QBC939Fig4.zip]

Slice	Count	Total Area	Average Size	%Area	Mean	IntDen
Clipboard	142	364513	2566.993	17.596	255	654583.204
Clipboard-1	141	396851	2814.546	19.147	255	717709.255
Clipboard-2	141	335668	2380.624	16.195	255	607059.149
Clipboard-3	107	237585	2030.641	11.463	255	517813.462
Clipboard-4	104	245653	2154.851	11.852	255	549486.974
Clipboard-5	93	218780	2352.473	10.555	255	599880.645
Clipboard-6	369	617360	1673.062	29.785	255	426630.894
Clipboard-7	314	722754	2301.764	34.87	255	586949.904
Clipboard-8	371	528820	1425.391	25.514	255	363474.663
