# Supplementary material for: The CLEC3B inhibits cellular proliferation and metastasis of cholangiocarcinoma through Wnt/β-catenin pathway
Source: PeerJ journal article supplement (doi:10.7717/peerj.18497), 2024-11-13
Supplement: RawDataFig1B.zip [file RawDataFig1B.zip]

## Sheet: Sheet1
Patient_ID	OS, overall survival (day)	OS_event	CLEC4M			Patient_ID	OS, overall survival (day)	OS_event	低			Patient_ID	OS, overall survival (day)	OS_event	高				低	高
121	1317	0	0			125	41	1	0.07			645	31	1	0.232			41	1
133	711	1	0			853	48	0	0.139			225	62	1	0.387			48	0
185	704	1	0			961	48	1	0.167			423	88	1	3.139			48	1
187	420	1	0			471	72	0	0			513	91	1	2.5			72	0
213	1535	0	0			493	117	1	0			437	98	1	0.226			117	1
217	425	1	0			525	139	1	0.126			953	123	1	0.95			139	1
235	295	1	0			567	169	1	0.116			151	140	1	2.973			169	1
267	1491	0	0			113	183	1	0.075			831	162	1	0.233			183	1
345	1360	0	0			141	195	1	0.181			977	164	0	0.273			195	1
367	295	1	0			147	216	1	0.015			591	181	1	2.142			216	1
387	668	1	0			337	220	1	0.183			535	184	1	0.74			220	1
393	1269	0	0			691	235	0	0			537	185	1	0.308			235	0
415	1140	0	0			433	245	0	0			221	187	1	4.395			245	0
425	341	1	0			583	247	1	0.036			243	189	1	0.748			247	1
433	245	0	0			435	264	1	0.032			381	210	1	0.309			264	1
443	1211	0	0			351	276	1	0.03			587	220	0	2.916			276	1
451	372	1	0			847	276	1	0.125			643	257	0	1.973			276	1
471	72	0	0			231	278	1	0.066			271	274	1	1.098			278	1
477	1141	0	0			827	283	0	0.137			637	274	1	1.627			283	0
487	1112	0	0			235	295	1	0			193	280	1	0.669			295	1
493	117	1	0			367	295	1	0			275	321	1	0.235			295	1
547	957	1	0			641	305	0	0.109			983	330	0	2.185			305	0
613	623	1	0			491	326	1	0.146			975	331	0	0.281			326	1
621	863	0	0			633	330	0	0			181	336	1	0.528			330	0
625	897	0	0			425	341	1	0			453	349	1	2.277			341	1
631	874	0	0			313	345	0	0.157			623	357	1	0.985			345	0
633	330	0	0			451	372	1	0			523	362	1	0.815			372	1
677	683	0	0			995	379	0	0.077			651	367	1	0.917			379	0
691	235	0	0			923	393	1	0			281	383	1	0.305			393	1
813	516	1	0			993	400	0	0.149			963	401	0	1.047			400	0
821	691	0	0			357	411	1	0.069			987	427	0	0.742			411	1
825	626	0	0			845	415	1	0.204			965	431	0	2.427			415	1
883	569	0	0			685	417	0	0.069			383	437	1	1.366			417	0
911	514	0	0			187	420	1	0			973	453	0	5.165			420	1
913	511	0	0			667	423	1	0.111			945	462	0	0.244			423	1
923	393	1	0			217	425	1	0			971	462	0	3.502			425	1
957	487	0	0			455	430	1	0.104			283	478	1	0.256			430	1
147	216	1	0.015			981	447	0	0.084			917	481	1	2.472			447	0
661	768	0	0.015			947	461	0	0.174			931	488	0	0.35			461	0
265	473	1	0.017			653	470	1	0.104			461	491	1	0.573			470	1
675	613	0	0.017			265	473	1	0.017			951	492	0	1.131			473	1
335	1384	0	0.025			927	477	0	0.147			155	492	1	2.921			477	0
817	583	0	0.026			937	482	0	0.129			941	498	0	0.412			482	0
351	276	1	0.03			957	487	0	0			285	499	0	0.332			487	0
467	1089	0	0.031			385	495	1	0.138			233	502	1	0.989			495	1
545	1038	0	0.031			913	511	0	0			555	508	1	0.461			511	0
245	1394	0	0.032			871	511	0	0.076			857	521	0	1.602			511	0
435	264	1	0.032			911	514	0	0			427	534	1	3.835			514	0
687	694	0	0.032			813	516	1	0			325	544	1	0.848			516	1
841	571	0	0.033			615	519	0	0.064			861	544	0	4.943			519	0
445	1181	1	0.035			681	523	1	0.167			925	547	0	0.524			523	1
551	903	0	0.035			881	526	0	0.096			875	548	0	0.551			526	0
241	593	1	0.036			865	537	0	0.11			855	554	0	0.269			537	0
565	912	0	0.036			877	545	0	0.174			921	561	0	1.171			545	0
583	247	1	0.036			883	569	0	0			851	562	0	0.541			569	0
135	775	0	0.037			841	571	0	0.033			843	566	0	0.214			571	0
521	1041	0	0.04			817	583	0	0.026			915	569	0	0.206			583	0
577	956	0	0.041			867	587	0	0.123			835	573	0	0.617			587	0
457	1175	0	0.05			241	593	1	0.036			885	575	0	4.327			593	1
473	1142	0	0.051			365	595	1	0.143			263	597	1	0.571			595	1
171	1185	0	0.052			675	613	0	0.017			131	626	1	0.316			613	0
495	1036	1	0.052			613	623	1	0			361	631	1	0.297			623	1
341	1112	0	0.056			825	626	0	0			811	650	1	0.387			626	0
823	637	0	0.056			823	637	0	0.056			111	682	1	0.635			637	0
611	816	0	0.057			387	668	1	0			215	685	1	0.392			668	1
665	774	0	0.057			677	683	0	0			447	709	0	2.539			683	0
237	914	1	0.061			821	691	0	0			655	717	1	0.484			691	0
573	986	0	0.062			687	694	0	0.032			553	718	0	0.971			694	0
615	519	0	0.064			185	704	1	0			673	724	0	1.135			704	1
231	278	1	0.066			133	711	1	0			683	730	0	0.337			711	1
357	411	1	0.069			693	715	0	0.114			863	732	0	3.773			715	0
685	417	0	0.069			661	768	0	0.015			175	735	1	0.482			768	0
125	41	1	0.07			515	773	1	0.078			261	745	1	0.232			773	1
563	1001	1	0.074			665	774	0	0.057			223	754	1	1.265			774	0
113	183	1	0.075			135	775	0	0.037			311	758	1	0.801			775	0
871	511	0	0.076			137	804	1	0.196			165	765	1	0.329			804	1
995	379	0	0.077			657	806	0	0.126			483	771	1	0.22			806	0
197	1152	0	0.078			611	816	0	0.057			663	793	0	0.461			816	0
515	773	1	0.078			375	846	1	0.177			117	808	1	1.591			846	1
635	856	0	0.083			635	856	0	0.083			647	820	0	0.483			856	0
981	447	0	0.084			621	863	0	0			617	834	0	0.605			863	0
421	1120	0	0.093			631	874	0	0			627	851	0	0.294			874	0
253	1108	0	0.094			625	897	0	0			255	851	1	1.448			897	0
881	526	0	0.096			551	903	0	0.035			557	869	1	3.361			903	0
561	1009	0	0.099			565	912	0	0.036			585	875	0	1.137			912	0
363	1256	0	0.101			237	914	1	0.061			355	939	1	0.349			914	1
455	430	1	0.104			577	956	0	0.041			581	966	0	0.324			956	0
653	470	1	0.104			547	957	1	0			575	970	0	1.455			957	1
395	1201	0	0.109			573	986	0	0.062			571	984	0	0.627			986	0
641	305	0	0.109			563	1001	1	0.074			475	1006	0	1.921			1001	1
865	537	0	0.11			561	1009	0	0.099			541	1035	0	2.391			1009	0
667	423	1	0.111			533	1028	0	0.149			543	1057	0	0.87			1028	0
693	715	0	0.114			277	1030	0	0.145			497	1062	0	3.924			1030	0
153	1625	1	0.116			495	1036	1	0.052			517	1074	0	0.397			1036	1
567	169	1	0.116			545	1038	0	0.031			531	1077	0	0.236			1038	0
867	587	0	0.123			521	1041	0	0.04			463	1091	0	4.143			1041	0
847	276	1	0.125			467	1089	0	0.031			511	1098	0	0.297			1089	0
525	139	1	0.126			273	1104	0	0.157			123	1101	1	3.875			1104	0
657	806	0	0.126			253	1108	0	0.094			191	1114	0	0.274			1108	0
937	482	0	0.129			487	1112	0	0			485	1114	0	0.278			1112	0
827	283	0	0.137			341	1112	0	0.056			177	1129	1	0.371			1112	0
385	495	1	0.138			421	1120	0	0.093			157	1173	0	0.272			1120	0
853	48	0	0.139			415	1140	0	0			317	1173	0	0.83			1140	0
365	595	1	0.143			477	1141	0	0			413	1188	0	1.419			1141	0
277	1030	0	0.145			473	1142	0	0.051			411	1193	0	0.89			1142	0
491	326	1	0.146			197	1152	0	0.078			343	1240	0	0.252			1152	0
927	477	0	0.147			457	1175	0	0.05			397	1251	0	3.734			1175	0
533	1028	0	0.149			445	1181	1	0.035			331	1265	0	4.348			1181	1
993	400	0	0.149			171	1185	0	0.052			145	1292	0	0.344			1185	0
323	1383	0	0.15			395	1201	0	0.109			127	1318	0	0.491			1201	0
115	1806	0	0.153			443	1211	0	0			347	1333	0	0.21			1211	0
273	1104	0	0.157			363	1256	0	0.101			163	1386	0	3.931			1256	0
313	345	0	0.157			393	1269	0	0			327	1393	0	0.556			1269	0
681	523	1	0.167			121	1317	0	0			167	1464	0	0.911			1317	0
961	48	1	0.167			345	1360	0	0			161	1496	0	0.768			1360	0
877	545	0	0.174			323	1383	0	0.15			257	1499	0	0.722			1383	0
947	461	0	0.174			335	1384	0	0.025			247	1507	0	0.241			1384	0
375	846	1	0.177			245	1394	0	0.032			251	1509	0	3.36			1394	0
141	195	1	0.181			267	1491	0	0			195	1544	0	2.08			1491	0
337	220	1	0.183			213	1535	0	0			211	1580	0	4.084			1535	0
137	804	1	0.196			153	1625	1	0.116			143	1590	1	0.989			1625	1
845	415	1	0.204			115	1806	0	0.153			183	1609	0	0.448			1806	0
915	569	0	0.206															31		1
347	1333	0	0.21															62		1
843	566	0	0.214															88		1
483	771	1	0.22															91		1
437	98	1	0.226															98		1
261	745	1	0.232															123		1
645	31	1	0.232															140		1
831	162	1	0.233															162		1
275	321	1	0.235															164		0
531	1077	0	0.236															181		1
247	1507	0	0.241															184		1
945	462	0	0.244															185		1
343	1240	0	0.252															187		1
283	478	1	0.256															189		1
855	554	0	0.269															210		1
157	1173	0	0.272															220		0
977	164	0	0.273															257		0
191	1114	0	0.274															274		1
485	1114	0	0.278															274		1
975	331	0	0.281															280		1
627	851	0	0.294															321		1
361	631	1	0.297															330		0
511	1098	0	0.297															331		0
281	383	1	0.305															336		1
537	185	1	0.308															349		1
381	210	1	0.309															357		1
131	626	1	0.316															362		1
581	966	0	0.324															367		1
165	765	1	0.329															383		1
285	499	0	0.332															401		0
683	730	0	0.337															427		0
145	1292	0	0.344															431		0
355	939	1	0.349															437		1
931	488	0	0.35															453		0
177	1129	1	0.371															462		0
225	62	1	0.387															462		0
811	650	1	0.387															478		1
215	685	1	0.392															481		1
517	1074	0	0.397															488		0
941	498	0	0.412															491		1
183	1609	0	0.448															492		0
555	508	1	0.461															492		1
663	793	0	0.461															498		0
175	735	1	0.482															499		0
647	820	0	0.483															502		1
655	717	1	0.484															508		1
127	1318	0	0.491															521		0
925	547	0	0.524															534		1
181	336	1	0.528															544		1
851	562	0	0.541															544		0
875	548	0	0.551															547		0
327	1393	0	0.556															548		0
263	597	1	0.571															554		0
461	491	1	0.573															561		0
617	834	0	0.605															562		0
835	573	0	0.617															566		0
571	984	0	0.627															569		0
111	682	1	0.635															573		0
193	280	1	0.669															575		0
257	1499	0	0.722															597		1
535	184	1	0.74															626		1
987	427	0	0.742															631		1
243	189	1	0.748															650		1
161	1496	0	0.768															682		1
311	758	1	0.801															685		1
523	362	1	0.815															709		0
317	1173	0	0.83															717		1
325	544	1	0.848															718		0
543	1057	0	0.87															724		0
411	1193	0	0.89															730		0
167	1464	0	0.911															732		0
651	367	1	0.917															735		1
953	123	1	0.95															745		1
553	718	0	0.971															754		1
623	357	1	0.985															758		1
143	1590	1	0.989															765		1
233	502	1	0.989															771		1
963	401	0	1.047															793		0
271	274	1	1.098															808		1
951	492	0	1.131															820		0
673	724	0	1.135															834		0
585	875	0	1.137															851		0
921	561	0	1.171															851		1
223	754	1	1.265															869		1
383	437	1	1.366															875		0
413	1188	0	1.419															939		1
255	851	1	1.448															966		0
575	970	0	1.455															970		0
117	808	1	1.591															984		0
857	521	0	1.602															1006		0
637	274	1	1.627															1035		0
475	1006	0	1.921															1057		0
643	257	0	1.973															1062		0
195	1544	0	2.08															1074		0
591	181	1	2.142															1077		0
983	330	0	2.185															1091		0
453	349	1	2.277															1098		0
541	1035	0	2.391															1101		1
965	431	0	2.427															1114		0
917	481	1	2.472															1114		0
513	91	1	2.5															1129		1
447	709	0	2.539															1173		0
587	220	0	2.916															1173		0
155	492	1	2.921															1188		0
151	140	1	2.973															1193		0
423	88	1	3.139															1240		0
251	1509	0	3.36															1251		0
557	869	1	3.361															1265		0
971	462	0	3.502															1292		0
397	1251	0	3.734															1318		0
863	732	0	3.773															1333		0
427	534	1	3.835															1386		0
123	1101	1	3.875															1393		0
497	1062	0	3.924															1464		0
163	1386	0	3.931															1496		0
211	1580	0	4.084															1499		0
463	1091	0	4.143															1507		0
885	575	0	4.327															1509		0
331	1265	0	4.348															1544		0
221	187	1	4.395															1580		0
861	544	0	4.943															1590		1
973	453	0	5.165															1609		0
