# Supplementary material for: The CLEC3B inhibits cellular proliferation and metastasis of cholangiocarcinoma through Wnt/β-catenin pathway
Source: PeerJ journal article supplement (doi:10.7717/peerj.18497), 2024-11-13
Supplement: TumorDataNudeMice.zip [file TumorDataNudeMice.zip]

## Sheet: Sheet1
	灰度值
		内参	目的
bax 1	nc	37745.7	20992.6	0.556158	1.63719
	oe	35648.6	32459.4	0.910537
bax 2	nc	56225.8	9825.66	0.174754	5.93368
	oe	52025.5	53946.9	1.03693				CLEC3B	1	1	1	3.00668	4.5967	2.94545
								Bax	1	1	1	1.63719	5.93368	1.23812
bax 3	nc	34889.3	37730.3	1.08143	1.23812			Bcl-2	1	1	1	0.25406	0.2227	0.283214
	oe	34494.9	46186.6	1.33894				E-cadherin	1	1	1	1.78264	3.12473	4.79479
								N-cadherin	1	1	1	0.679771	0.517933	0.617771
								β-catenin	1	1	1	0.279182	0.0448555	0.434083
bcl-2 1	nc	47775.2	40580.5	0.849405	0.25406			P-gsk3β	1	1	1	0.522378	0.245591	0.513903
	oe	44447.2	9591.7	0.2158				Gsk3β	1	1	1	0.936339	1.17735	0.921907
								Cyclind1	1	1	1	0.492913	0.355915	0.673893
bcl-2 2	nc	43943.6	41326.9	0.940454	0.2227			C-myc	1	1	1	0.105383	0.499926	0.65083
	oe	47203.7	9886.31	0.209439
bcl-2 3	nc	50147.7	44279.2	0.882977	0.283214
	oe	50244.1	12564.6	0.250072
β-catenin 1	nc	46395.3	38418.6	0.828072	0.279182
	oe	46670.3	10789.4	0.231182
β-catenin 2	nc	47029.4	41836.8	0.889588	0.0448555
	oe	47651.3	1901.43	0.0399029
β-catenin 3	nc	59454.1	52969.8	0.890936	0.434083
	oe	58679.3	22693.6	0.38674
clec3b 1	nc	54424.7	27530.9	0.505853	3.00668
	oe	50679.8	77080.8	1.52094
clec3b 2	nc	56033.1	16353.6	0.291855	4.5967
	oe	54561.9	73198.6	1.34157
clec3b 3	nc	44270.4	14936.5	0.337392	2.94545
	oe	44699.7	44421.2	0.993771
c-myc 1	nc	52250.9	30465.9	0.58307	0.105383
	oe	50035	3074.43	0.0614455
c-myc 2	nc	53535.7	37658.9	0.703435	0.499926
	oe	53953.4	18973.6	0.351666
c-myc 3	nc	43737.1	44991	1.02867	0.65083
	oe	45606.9	30533.2	0.669488
cyclind1 1	nc	58669.3	60241.9	1.0268	0.492913
	oe	58013.5	29362.1	0.506125
cyclind1 2	nc	64865	36121.8	0.556876	0.355915
	oe	59978.4	11887.8	0.198201
cyclind1 3	nc	47600.9	39630.4	0.832555	0.673893
	oe	46877.1	26300.5	0.561053
e-cadherin 1	nc	45936.3	22589.6	0.491758	1.78264
	oe	42872.9	37583.4	0.876626
e-cadherin 2		51981.1	11766.5	0.226361	3.12473
		52012.5	36789.3	0.707317
e-cadherin 3		67711.9	14532.3	0.21462	4.79479
		61755.2	63549.6	1.02906
gsk3β 1		53203.3	48049.8	0.903135	0.936339
		50206.3	42456.5	0.84564
gsk3β 2		58024.4	39694.4	0.684099	1.17735
		53846.7	43369.4	0.805424
gsk3β 3		50104.7	42925.8	0.856722	0.921907
		46997.1	37119.2	0.789818
n-cadherin 1		44896.4	37683.8	0.83935	0.679771
		49076.3	28001.3	0.570566
n-cadherin 2		53134.1	36523.7	0.687387	0.517933
		57018.5	20299.8	0.356021
n-cadherin 3		30906.4	64402.5	2.08379	0.617771
		31806.8	40945.2	1.28731
p-gsk3β 1		55396.1	47424	0.856088	0.522378
		53347.6	23857.1	0.447201
p-gsk3β 2		44331	46696.3	1.05336	0.245591
		47015.9	12162.8	0.258694
p-gsk3β 3		43888.2	36760.8	0.837601	0.513903
		46154.2	19866.9	0.430446
