# Supplementary material for: The CLEC3B inhibits cellular proliferation and metastasis of cholangiocarcinoma through Wnt/β-catenin pathway
Source: PeerJ journal article supplement (doi:10.7717/peerj.18497), 2024-11-13
Supplement: WB.zip [file WB.zip]

## Sheet: Sheet1
		gray value	gray value						gray value	gray value
		内参	目的						内参	目的
bax 1	oe	48269.8	40204	0.832901	1.51534			si	21493.6	56944.2	2.64935	0.372539
	oe	40521.1	51142.8	1.26213	#DIV/0!			si	26165.5	25825	0.986989	#DIV/0!
	oe			#DIV/0!	#DIV/0!			si			#DIV/0!	#DIV/0!
bax 2	oe	41943.5	24528	0.584788	1.51709			si	45700.4	41458.3	0.907177	0.409868
	oe	46598.1	41340.8	0.887179	#DIV/0!			si	43001.3	15988.9	0.371823	#DIV/0!
	oe			#DIV/0!	#DIV/0!			si			#DIV/0!	#DIV/0!
bax 3	oe	37302.9	25123.8	0.67351	1.60253			si	42282	44521.2	1.05296	0.433523
	oe	39875.7	43038.5	1.07932	#DIV/0!			si	44371.8	20255	0.456482	#DIV/0!
	oe			#DIV/0!	#DIV/0!			si			#DIV/0!	#DIV/0!
bcl-2 1	oe	41458.3	50205.8	1.21099	0.456537			si	35922.1	10489.1	0.291996	2.73769
	oe	42411.5	23447.8	0.552864	#DIV/0!			si	38042.7	30411.1	0.799395	#DIV/0!
	oe			#DIV/0!	#DIV/0!			si			#DIV/0!	#DIV/0!
bcl-2 2	oe	39636.5	42252.7	1.06601	0.720695			si	36478.1	12453.9	0.341406	2.16508
	oe	40668.3	31244.1	0.768265	#DIV/0!			si	40524.4	29954.4	0.739169	#DIV/0!
	oe			#DIV/0!	#DIV/0!			si			#DIV/0!	#DIV/0!
bcl-2 3	oe	35653.3	49292.5	1.38255	0.503784			si	37854.5	15446.2	0.408042	2.02471
	oe	44528.9	31014.7	0.696508	#DIV/0!			si	39458.4	32599.1	0.826165	#DIV/0!
	oe			#DIV/0!	#DIV/0!			si			#DIV/0!	#DIV/0!
β-catenin 1	oe	37169.5	39085.3	1.05154	0.702614			si	31746.2	20593.7	0.648696	1.50521
	oe	36469.2	26944.5	0.738828	#DIV/0!			si	37424.7	36542.4	0.976426	#DIV/0!
	oe			#DIV/0!	#DIV/0!			si			#DIV/0!	#DIV/0!
β-catenin 2	oe	39085.3	34566.7	0.884392	0.704038			si	37949.3	28572.2	0.752903	1.44404
	oe	39548.3	24624.6	0.622646	#DIV/0!			si	35453.2	38545.4	1.08722	#DIV/0!
	oe			#DIV/0!	#DIV/0!			si			#DIV/0!	#DIV/0!
β-catenin 3	oe	51850.4	38817.4	0.748641	0.647938			si	35003.7	24520.1	0.7005	1.80245
	oe	44125.6	21404.1	0.485073	#DIV/0!			si	33395.3	42165.3	1.26261	#DIV/0!
	oe			#DIV/0!	#DIV/0!			si			#DIV/0!	#DIV/0!
clec3b 1	oe	44347.6	19541.4	0.440641	2.1946			si	42769.1	51240.1	1.19806	0.332108
	oe	43257	41830.8	0.96703	#DIV/0!			si	42763.5	17015	0.397887	#DIV/0!
	oe			#DIV/0!	#DIV/0!			si			#DIV/0!	#DIV/0!
clec3b 2	oe	64238.2	20503.9	0.319185	3.90359			si	43967.5	48561	1.10448	0.421635
	oe	65488.8	81597	1.24597	#DIV/0!			si	43844.5	20417.8	0.465686	#DIV/0!
	oe			#DIV/0!	#DIV/0!			si			#DIV/0!	#DIV/0!
clec3b 3	oe	53050.8	40514.3	0.763688	2.05238			si	50356.2	82702	1.64234	0.209089
	oe	62277.5	97612.4	1.56738	#DIV/0!			si	72772.5	24989.8	0.343396	#DIV/0!
	oe			#DIV/0!	#DIV/0!			si			#DIV/0!	#DIV/0!
c-myc 1	oe	33257.4	33119.3	0.995848	0.176096			si	47627.9	12170.4	0.25553	2.51817
	oe	35045.8	6145.81	0.175365	#DIV/0!			si	39347.2	25318.7	0.643469	#DIV/0!
	oe			#DIV/0!	#DIV/0!			si			#DIV/0!	#DIV/0!
c-myc 2	oe	38064.3	36858.1	0.968309	0.321297			si	45132.7	20145.5	0.446361	2.16949
	oe	32519.1	10117.2	0.311115	#DIV/0!			si	41844.8	40521.5	0.968375	#DIV/0!
	oe			#DIV/0!	#DIV/0!			si			#DIV/0!	#DIV/0!
c-myc 3	oe	54729.6	38484.8	0.703181	0.596276			si	42418.7	12070.7	0.284561	3.10766
	oe	52777	22128.9	0.41929	#DIV/0!			si	43008.5	38033.2	0.884318	#DIV/0!
	oe			#DIV/0!	#DIV/0!			si			#DIV/0!	#DIV/0!
cyclind1 1	oe	46399.7	42370.7	0.913168	0.589915			si	38572.2	22051.9	0.571706	1.92979
	oe	50012.4	26941.2	0.538692	#DIV/0!			si	38545.4	42526	1.10327	#DIV/0!
	oe			#DIV/0!	#DIV/0!			si			#DIV/0!	#DIV/0!
cyclind1 2	oe	41886.1	40521.8	0.96743	0.52698			si	45564.2	31597.3	0.693466	1.88141
	oe	40521.4	20658.5	0.509816	#DIV/0!			si	37788	49301.8	1.30469	#DIV/0!
	oe			#DIV/0!	#DIV/0!			si			#DIV/0!	#DIV/0!
cyclind1 3	oe	39102.4	44199.2	1.13035	0.495485			si	41184.6	27542.1	0.668749	1.79047
	oe	45201.9	25316.2	0.560069	#DIV/0!			si	40521.3	48519.3	1.19738	#DIV/0!
	oe			#DIV/0!	#DIV/0!			si			#DIV/0!	#DIV/0!
e-cadherin 1	oe	50568.1	19706.3	0.389698	1.74363			si	22326.9	35081.3	1.57126	0.422428
	oe	52265.6	35513.8	0.679487	#DIV/0!			si	34417.8	22844.5	0.663742	#DIV/0!
	oe			#DIV/0!	#DIV/0!			si			#DIV/0!	#DIV/0!
e-cadherin 2	oe	41339.4	22326.9	0.540089	1.55567			si	43813	38938.1	0.888733	0.364162
	oe	40963.9	34417.8	0.840197	#DIV/0!			si	39872.5	12904.4	0.323642	#DIV/0!
	oe			#DIV/0!	#DIV/0!			si			#DIV/0!	#DIV/0!
e-cadherin 3	oe	42552.3	25471.1	0.598584	1.51297			si	48975.1	40943.1	0.835999	0.403498
	oe	42417.7	38415.3	0.905642	#DIV/0!			si	43565.8	14695.8	0.337324	#DIV/0!
	oe			#DIV/0!	#DIV/0!			si			#DIV/0!	#DIV/0!
gsk3β 1	oe	43981.1	36259.1	0.824425	1.33395			si	28630.6	16545.5	0.577894	0.987008
	oe	41101.5	45201.1	1.09974	#DIV/0!			si	32541.9	18561.5	0.570387	#DIV/0!
	oe			#DIV/0!	#DIV/0!			si			#DIV/0!	#DIV/0!
gsk3β 2	oe	24368.6	39542.1	1.62266	1.20754			si	28172.7	29799.1	1.05773	0.875922
	oe	20542.3	40251.3	1.95944	#DIV/0!			si	35245.4	32654.6	0.926491	#DIV/0!
	oe			#DIV/0!	#DIV/0!			si			#DIV/0!	#DIV/0!
gsk3β 3	oe	25414.3	35011.5	1.37763	1.24819			si	43984.9	44189.7	1.00465	0.945559
	oe	23658.1	40681.3	1.71955	#DIV/0!			si	37994.2	36093	0.94996	#DIV/0!
	oe			#DIV/0!	#DIV/0!			si			#DIV/0!	#DIV/0!
n-cadherin 1	oe	46629.8	41177.5	0.883072	0.529726			si	77548.3	29067.4	0.37483	2.97424
	oe	41627.2	19472.6	0.467786	#DIV/0!			si	76854.4	85680	1.11483	#DIV/0!
	oe			#DIV/0!	#DIV/0!			si			#DIV/0!	#DIV/0!
n-cadherin 2	oe	41177.5	40693.4	0.988243	0.696274			si	29067.4	21268.7	0.7317	1.80748
	oe	39257.3	27012.5	0.688088	#DIV/0!			si	30254.7	40012.9	1.32253	#DIV/0!
	oe			#DIV/0!	#DIV/0!			si			#DIV/0!	#DIV/0!
n-cadherin 3	oe	54628.8	35008.3	0.64084	0.436034			si	48015.4	22465.8	0.467887	2.18127
	oe	52206.1	14587.8	0.279428	#DIV/0!			si	39765.4	40584	1.02059	#DIV/0!
	oe			#DIV/0!	#DIV/0!			si			#DIV/0!	#DIV/0!
p-gsk3β 1	oe	39500.5	46587.5	1.17941	0.571141			si	36597.9	24553.9	0.670911	1.92232
	oe	40022.3	26959.5	0.673613	#DIV/0!			si	36439	46995.4	1.2897	#DIV/0!
	oe			#DIV/0!	#DIV/0!			si			#DIV/0!	#DIV/0!
p-gsk3β 2	oe	40936.8	44137.9	1.0782	0.47654			si	44252.1	20806.8	0.470188	2.30846
	oe	45205.3	23226.6	0.513803	#DIV/0!			si	44790.8	48616.3	1.08541	#DIV/0!
	oe			#DIV/0!	#DIV/0!			si			#DIV/0!	#DIV/0!
p-gsk3β 3	oe	23631.1	45759	1.93639	0.562191			si	56076.3	30524.1	0.544332	2.84494
	oe	22568.1	24568.1	1.08862	0			si	50704.6	78520.6	1.54859	0
									OE
									CLEC3B	1	1	1	2.1946	3.90359	2.05238
									β-catenin	1	1	1	0.702614	0.704038	0.647938
									GSK3β	1	1	1	1.33395	1.20754	1.24819
									p-GSK3β	1	1	1	0.571141	0.47654	0.562191
									SI
									CLEC3B	1	1	1	0.332108	0.421635	0.209089
									β-catenin	1	1	1	1.50521	1.44404	1.80245
									GSK3β	1	1	1	0.987008	0.875922	0.945559
									p-GSK3β	1	1	1	1.92232	2.30846	2.84494
