# Supplementary figures and images for: The CLEC3B inhibits cellular proliferation and metastasis of cholangiocarcinoma through Wnt/β-catenin pathway
Source: PeerJ journal article supplement (doi:10.7717/peerj.18497), 2024-11-13

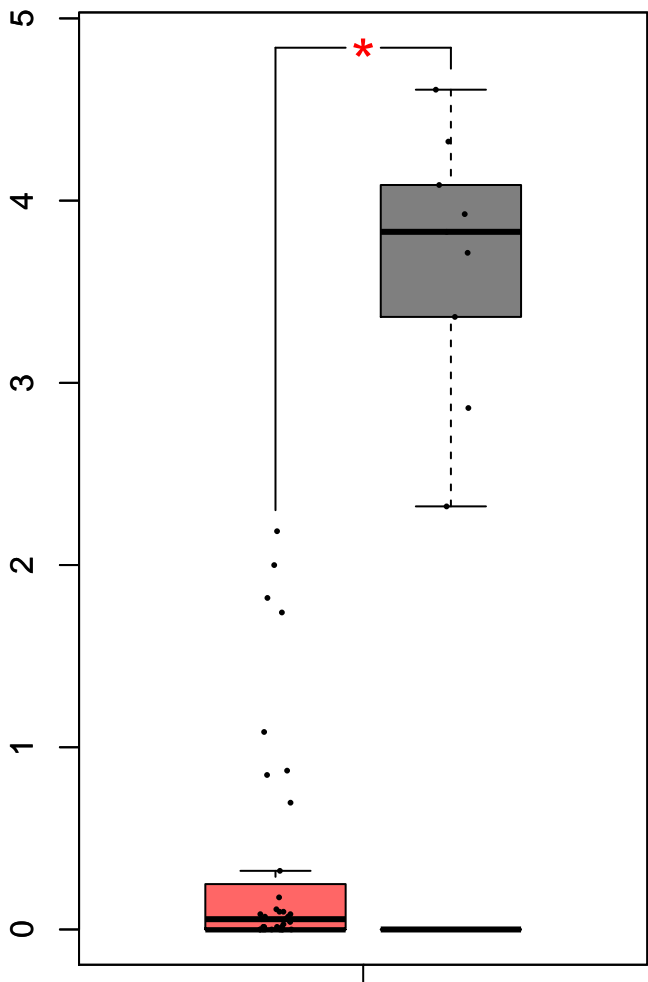

CHOL  
(num(T)=36; num(N)=9)

Supplement: TCGAFig1A.zip [file TCGAFig1A.zip]

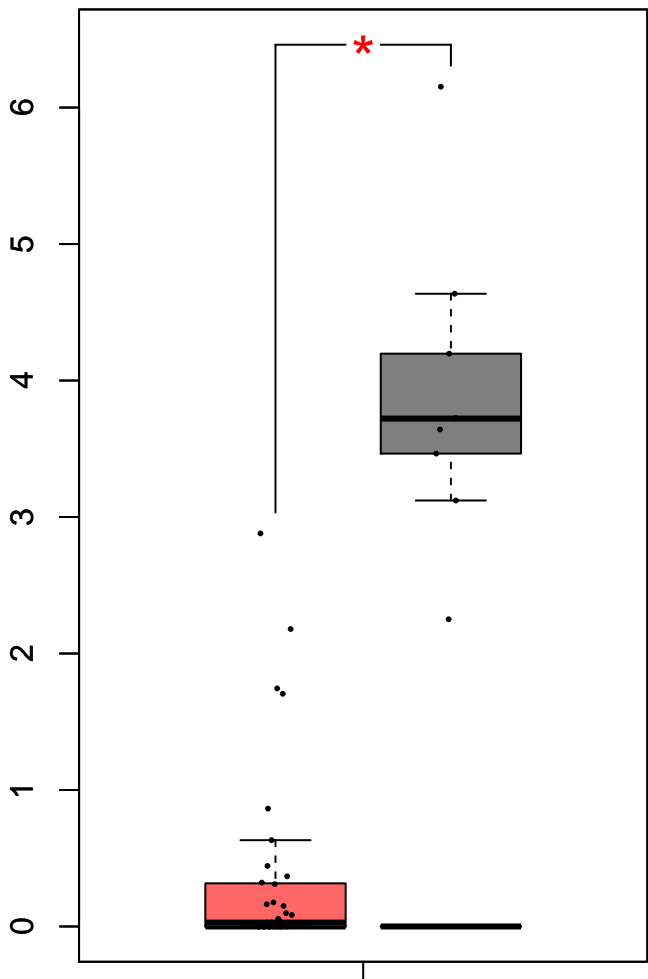

CHOL  
(num(T)=36; num(N)=9)

Supplement: TCGAFig1A.zip [file TCGAFig1A.zip]

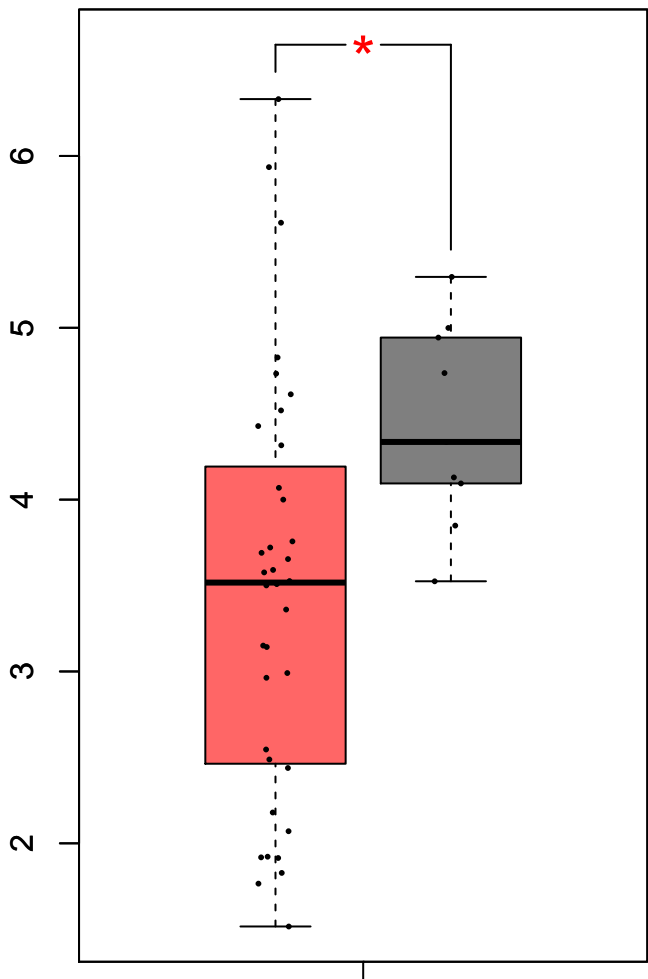

CHOL  
(num(T)=36; num(N)=9)

Supplement: TCGAFig1A.zip [file TCGAFig1A.zip]

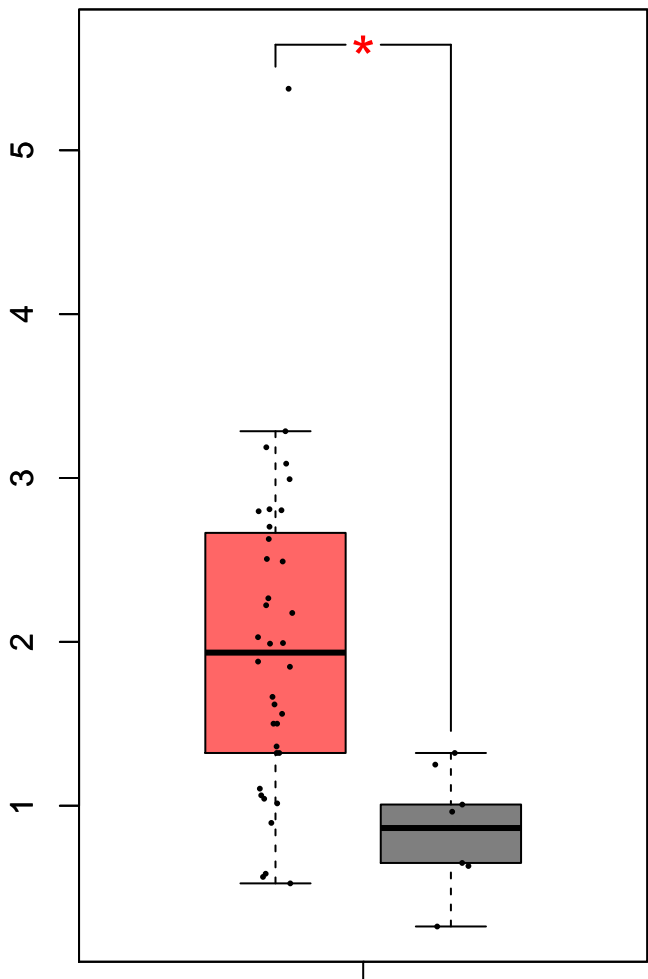

CHOL  
(num(T)=36; num(N)=9)

Supplement: TCGAFig1A.zip [file TCGAFig1A.zip]

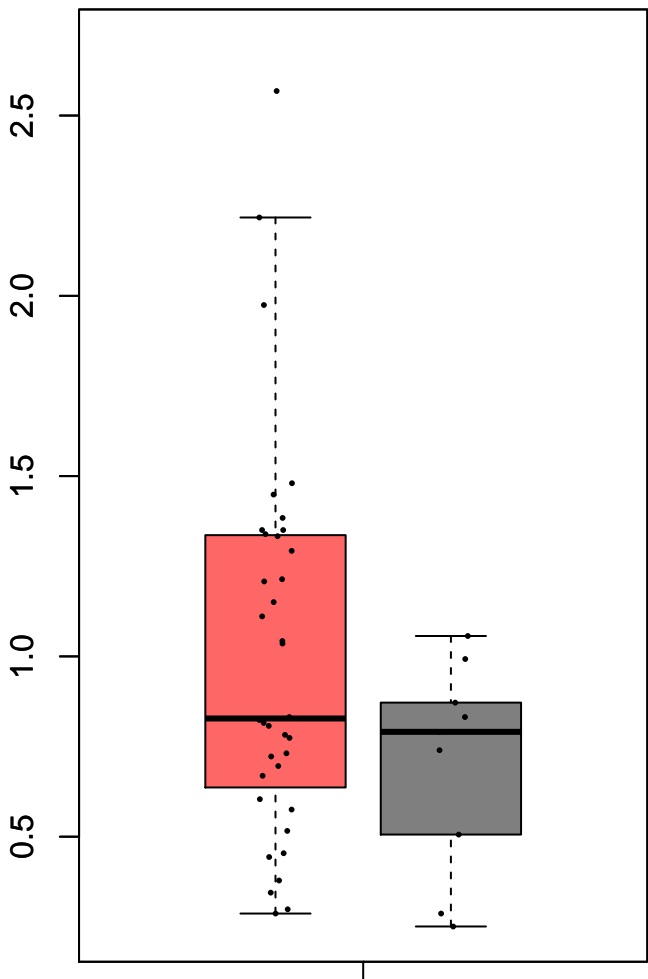

CHOL  
(num(T)=36; num(N)=9)

Supplement: TCGAFig1A.zip [file TCGAFig1A.zip]

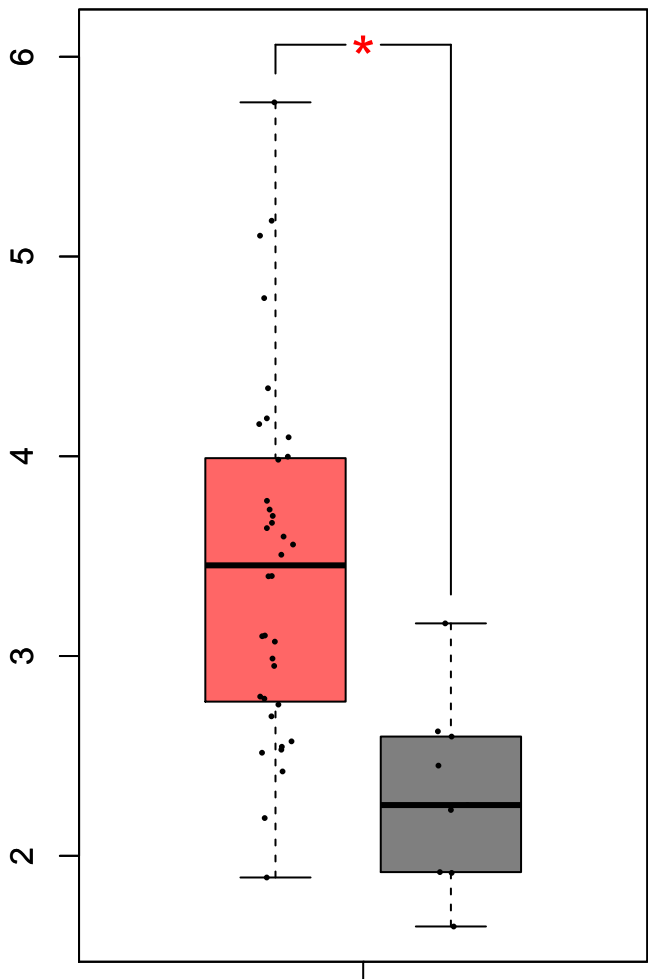

CHOL  
(num(T)=36; num(N)=9)

Supplement: TCGAFig1A.zip [file TCGAFig1A.zip]

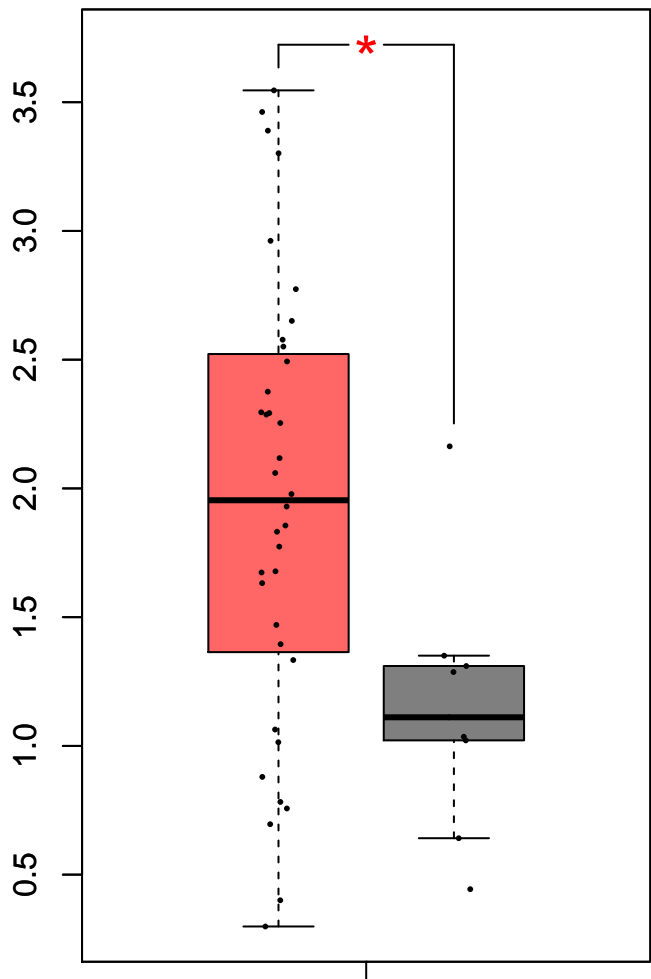

CHOL  
(num(T)=36; num(N)=9)

Supplement: TCGAFig1A.zip [file TCGAFig1A.zip]

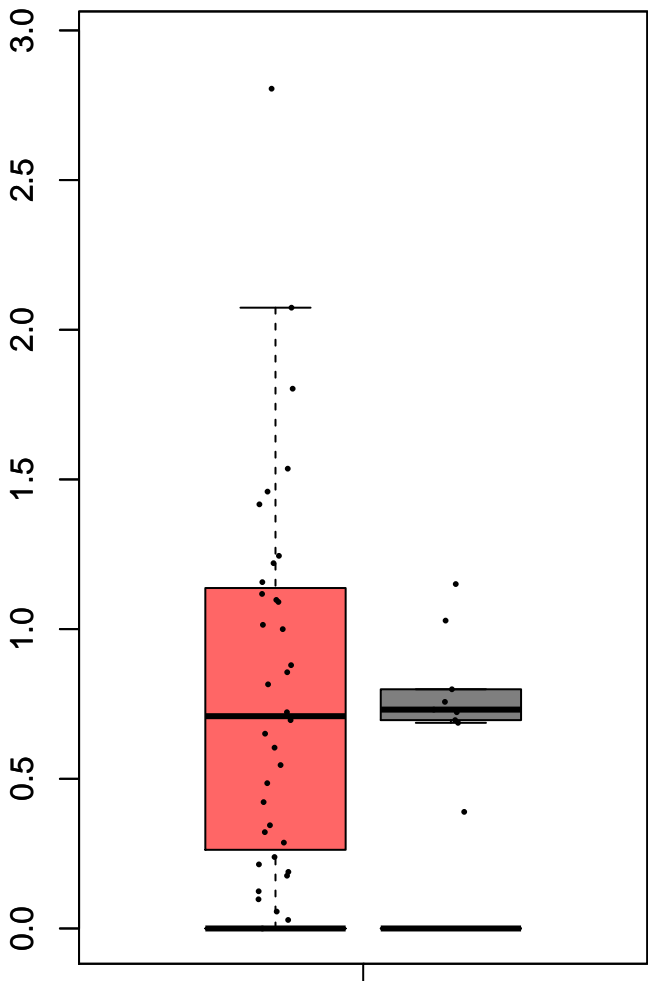

CHOL  
(num(T)=36; num(N)=9)

Supplement: TCGAFig1A.zip [file TCGAFig1A.zip]

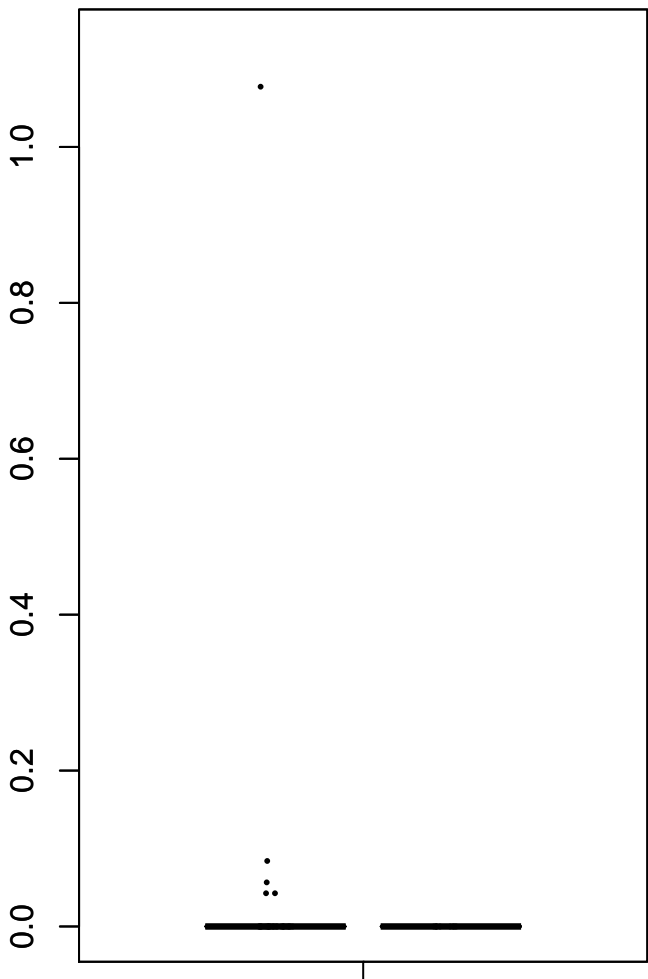

CHOL  
(num(T)=36; num(N)=9)

Supplement: TCGAFig1A.zip [file TCGAFig1A.zip]

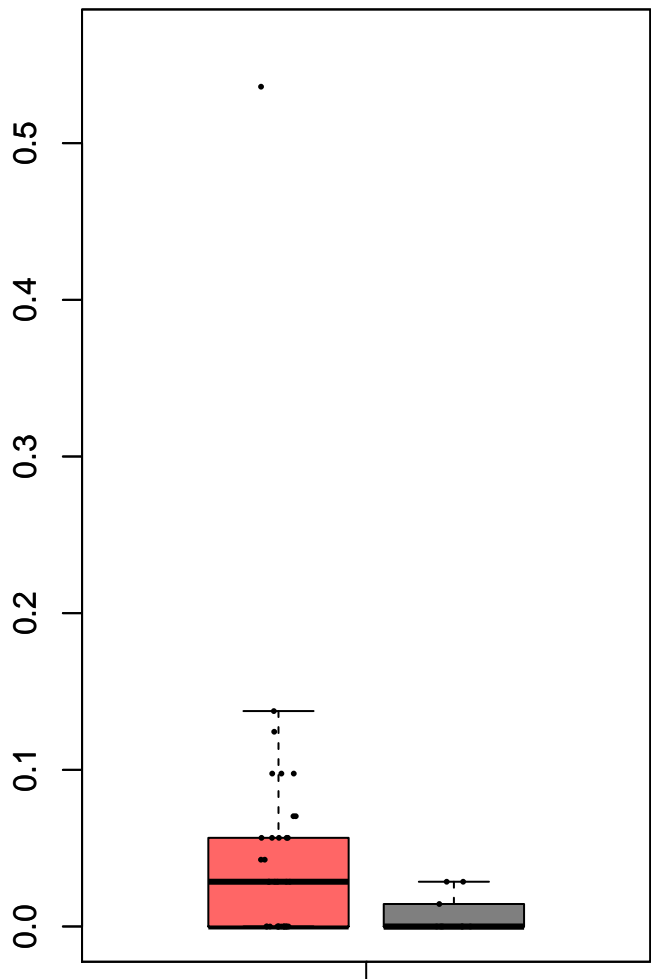

CHOL  
(num(T)=36; num(N)=9)

Supplement: TCGAFig1A.zip [file TCGAFig1A.zip]

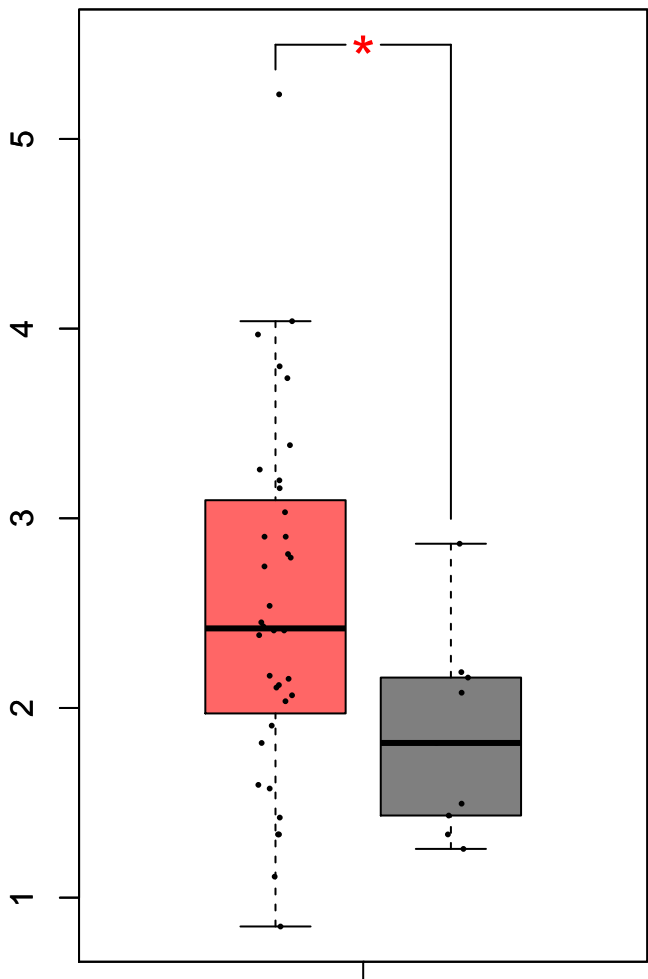

CHOL  
(num(T)=36; num(N)=9)

Supplement: TCGAFig1A.zip [file TCGAFig1A.zip]

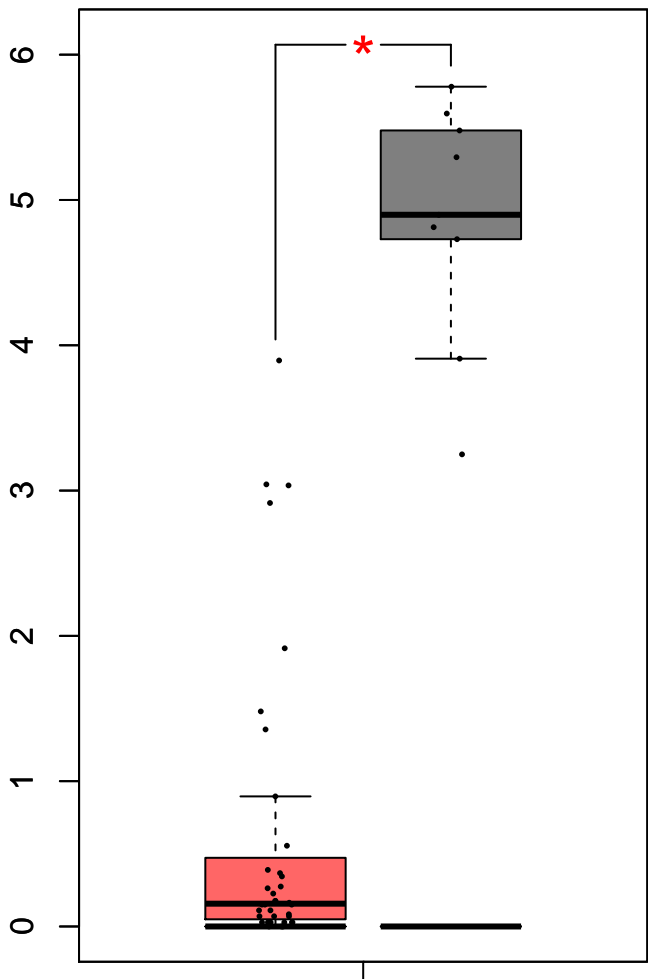

CHOL  
(num(T)=36; num(N)=9)

Supplement: TCGAFig1A.zip [file TCGAFig1A.zip]
